# Supplementary material for: Ultrahigh sensitivity wearable sensors enabled by electrophoretic deposition of carbon nanostructured composites onto everyday fabrics
Source: Royal Society of Chemistry journal article supplement (doi:10.1039/d1tc05132f), 2022-01-01
Supplement: d1tc05132f1.pdf [file d1tc05132f1.pdf]

## Supporting Information

### Ultrahigh Sensitivity Wearable Sensors Enabled by Electrophoretic Deposition of Carbon Nanostructured Composites onto Everyday Fabrics

Sagar M. Doshi, Colleen Murray, Amit Chaudhari, Dae Han Sung, Erik T. Thostenson\*

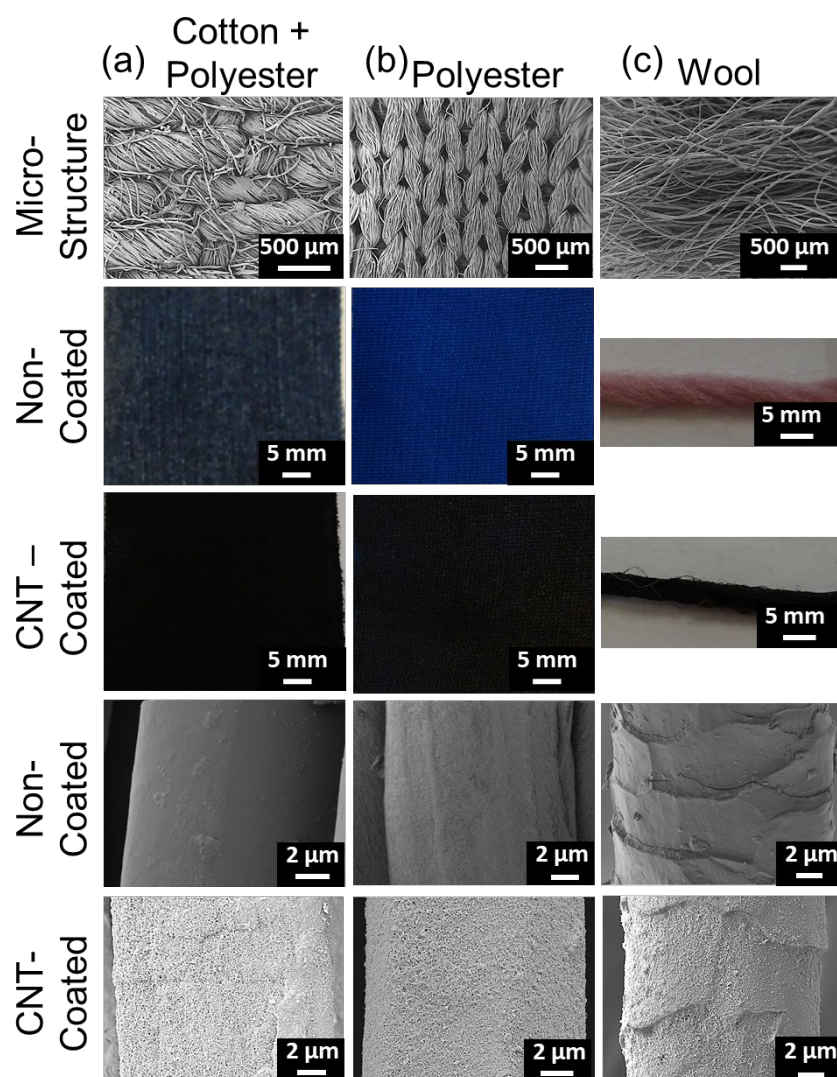

Figure S1. Polyethyleneimine functionalized carbon nanotube coating using electrophoretic deposition on a variety of commercially available fabrics/yarns showing different microstructures at the yarn and the fiber level. (a) woven cotton-polyester blend, (b) knitted polyester and (c) wool yarn

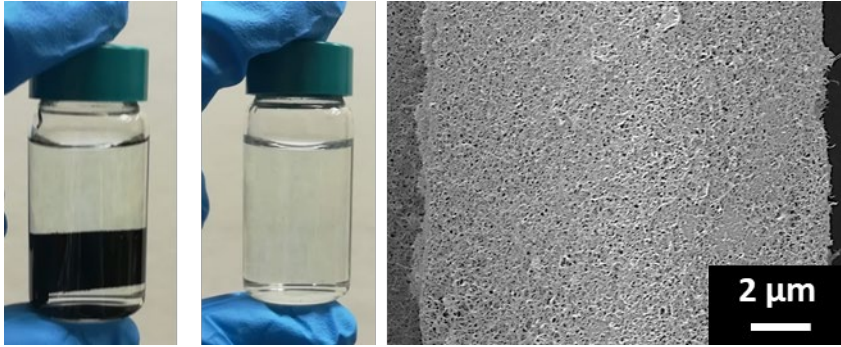

Figure S2. Coated fabric subjected to a sonication test in tap water without detergent. The good clarity of water after sonication, without a significant amount of loose particles indicates a robust nanocomposite film coating on fibers, and SEM micrograph showing the coating after sonication.
